# Supplementary material
Source: PubMed Central journal article supplement (PMC7213258)
Supplement: NIHMS1578097-supplement-2.pdf [file NIHMS1578097-supplement-2.pdf]

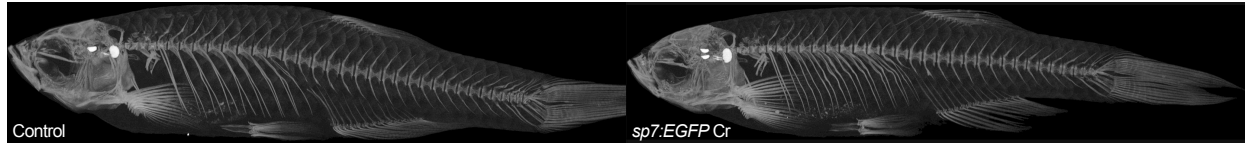

**Figure S1, Related to Figure 1.  $\mu$ CT scans of *sp7:EGFP* somatic mutant zebrafish show normal bone morphology.** Loss-of-fluorescence does not appear to be attributable to loss of bony tissue as *sp7:EGFP* somatic mutants (right) have grossly normal skeletons as adults.

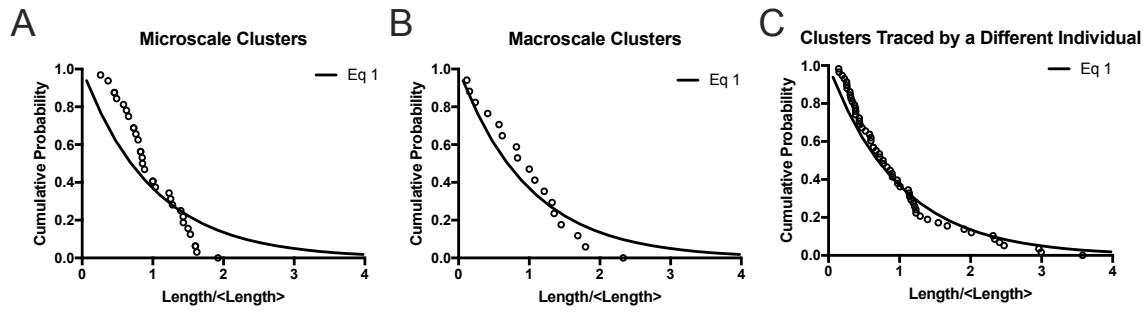

**Figure S2, Related to Figure 1. Loss-of-function cluster size distributions are best modeled by fragmentation and merger theory when microscale and macroscale clusters are considered in combination. (A-B) Vertebral cluster size distributions normalized by mean cluster length when microscale (A) and macroscale (B) clusters are treated independently. Note that the curve fit for panels A and B is weaker than that in Figure 1K. (C) The same images used for cluster size analysis in Figure 1K were analyzed by a different individual. Cluster size distributions appear to be robust to thresholding differences between observers.**

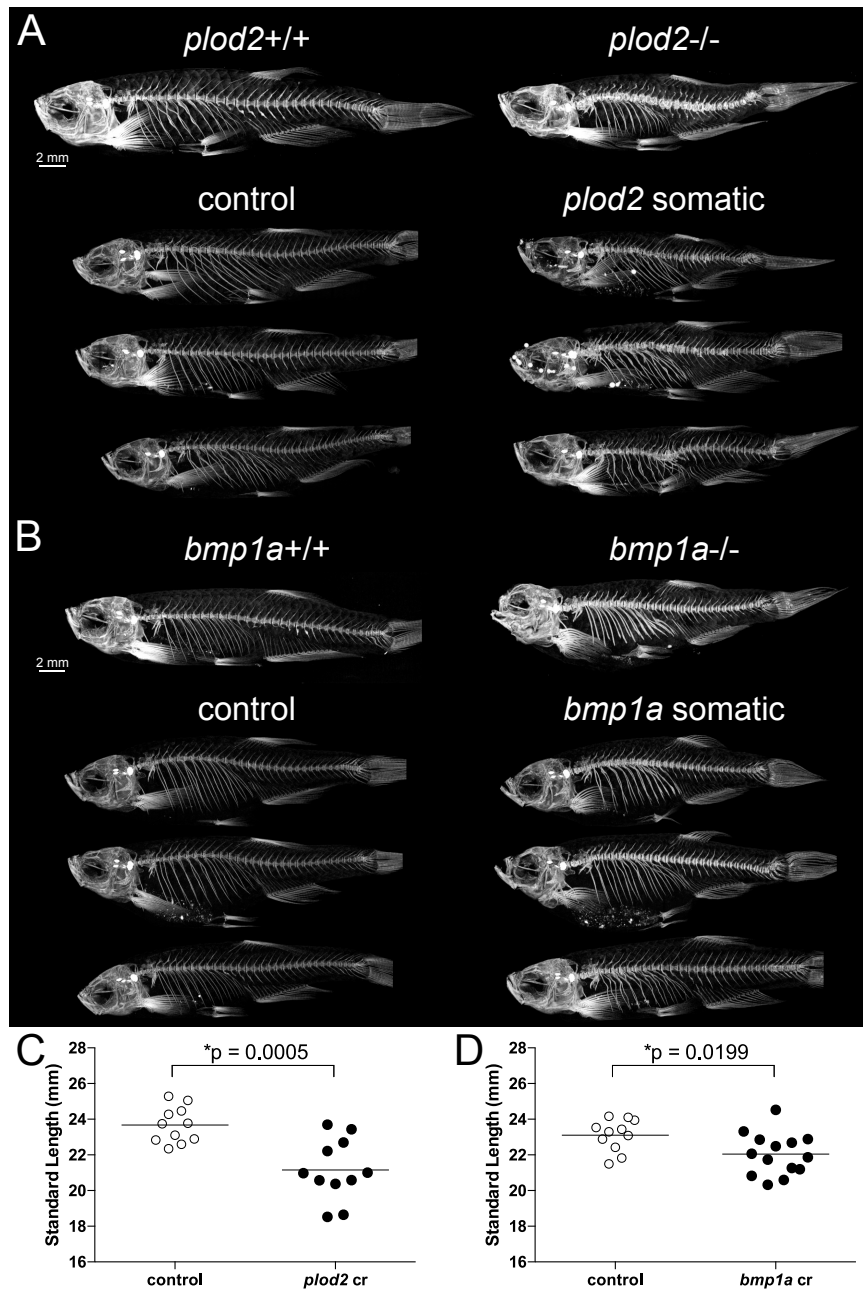

**Figure S3, Related to Figure 2. Somatic mutants for *bmp1a* and *plod2* exhibit inter- and intra-animal phenotypic variability.** (A-B) Representative maximum intensity projections of microCT scans. Germline controls (+/+) and mutants (-/-) for each gene are shown above somatic cohorts. (A) Irregular expressivity seen in the spine of *plod2* somatic mutants was not evident in the *plod2* germline mutant. (B) Inter-animal variation in radiopacity of the spine for somatic *bmp1a* fish was evident, while intra-animal variation along the axial skeleton was less apparent. (C-D) Somatic mutants are shorter than clutchmates. Standard lengths are statistically reduced in both

somatic lines for *plod2* (C, n=11/group) and *bmp1a* (D, n=11 controls, n=14 *bmp1a* somatic mutants) compared to clutchmate controls.

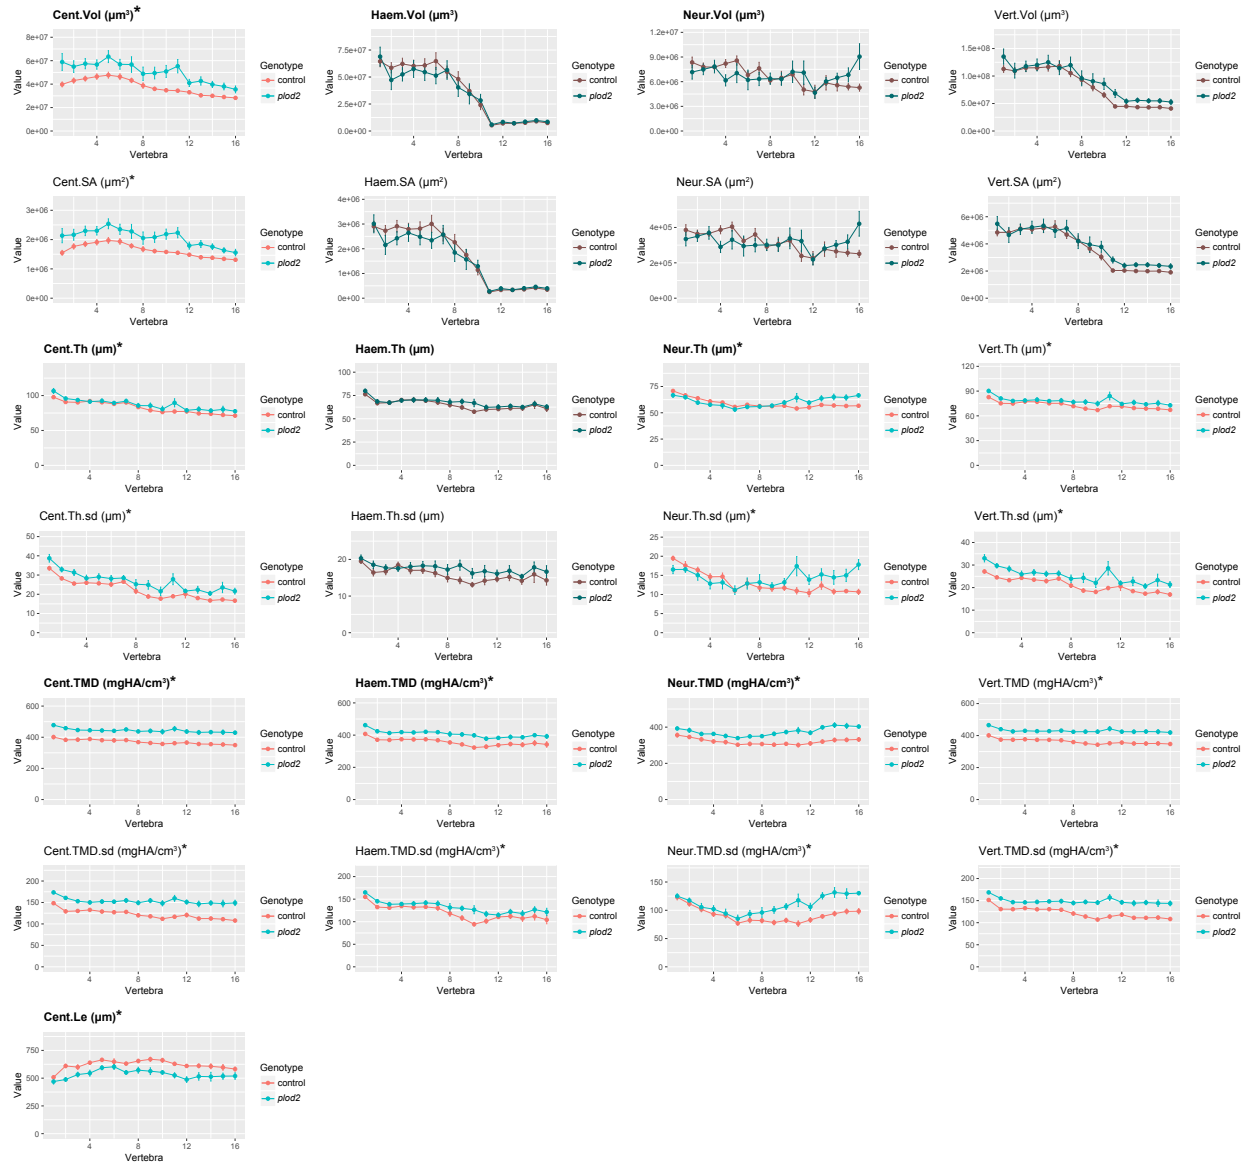

**Figure S4, Related to Figure 2. FishCuT analysis of *plod2* somatic mutants for all 25 combinatorial measures.** Phenotypic features, indicated by the graph heading (with units for y-axis), plotted as a function of vertebra (mean ± SE, n = 11/group). Plots associated with p < 0.05 in the global test are colored in a lighter coloring scheme and denoted by an asterisk in the graph heading. In addition to the 7 of 10 measures plotted in Figure 2B-K (bold titles) that are statistically different, 10 of the remaining 15 measures are also statistically different, including increased variability in tissue mineral density of all structures for *plod2* somatic mutants. Cent, centrum; Haem, haemal arch; Neur, neural arch; Vert, total vertebra; Vol, volume; SA, surface area; Th, thickness; TMD, tissue mineral density; Le, length; sd, standard deviation (variability).

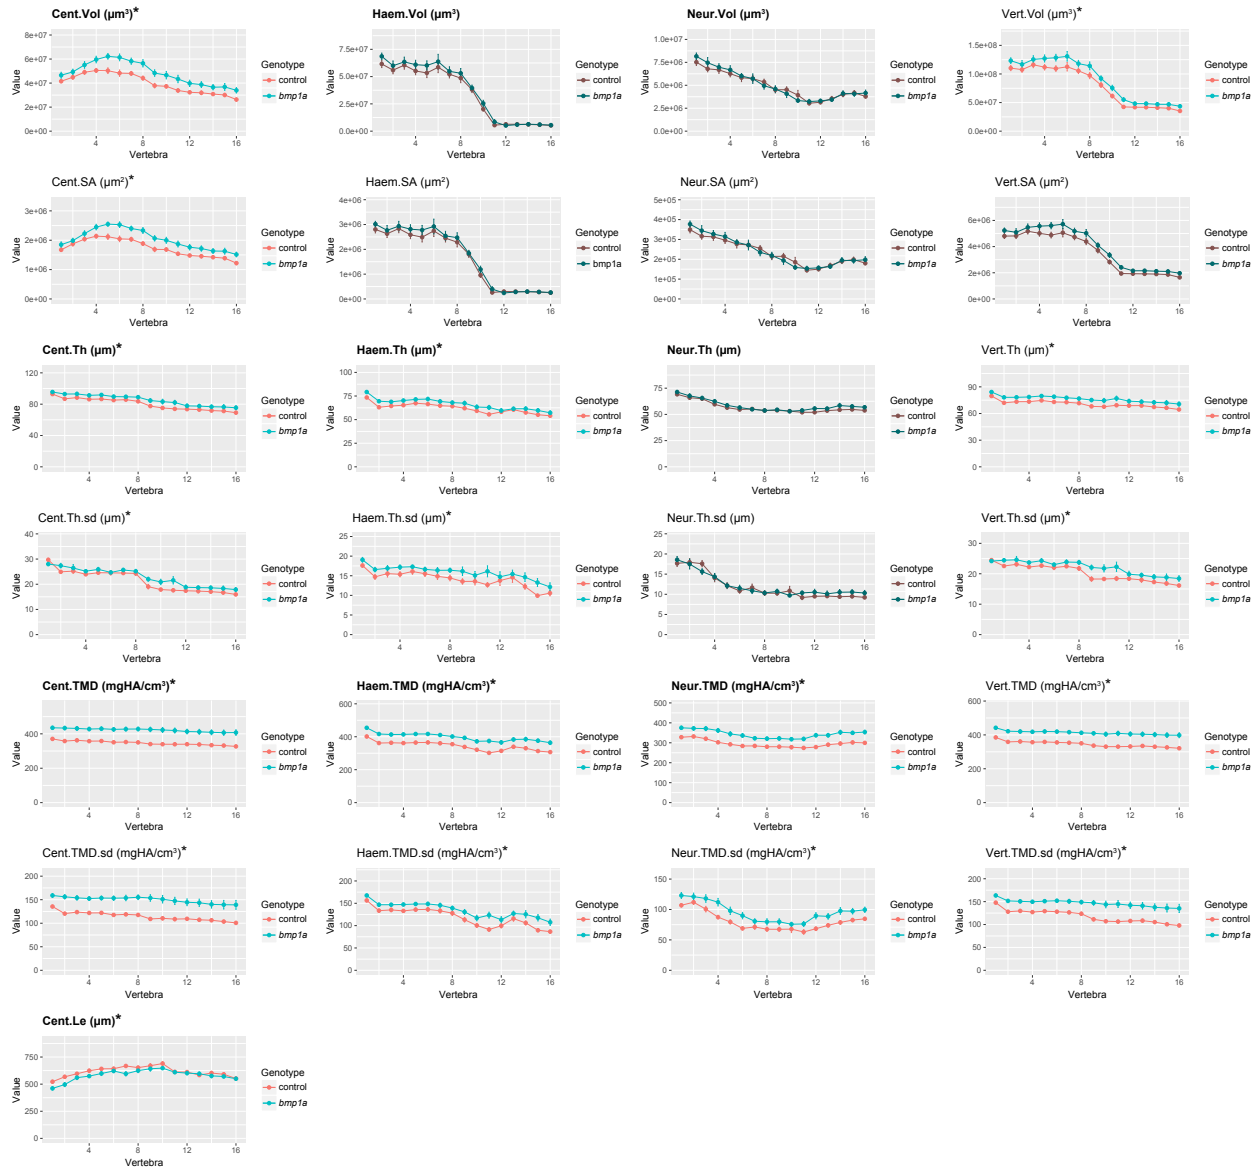

**Figure S5, Related to Figure 2. FishCuT analysis of *bmp1a* somatic mutants for all 25 combinatorial measures.** Phenotypic features, indicated by the graph heading (with units for y-axis), plotted as a function of vertebra (mean  $\pm$  SE, n = 15/group). Plots associated with  $p < 0.05$  in the global test are colored in a lighter coloring scheme and denoted by an asterisk in the graph heading. In addition to the 7 of 10 measures plotted in Figure 2B'-K' (bold titles) that are statistically different, 11 of the remaining 15 measures are also statistically different, including increased variability in tissue mineral density of all structures for *bmp1a* somatic mutants. Cent, centrum; Haem, haemal arch; Neur, neural arch; Vert, total vertebra; Vol, volume; SA, surface area; Th, thickness; TMD, tissue mineral density; Le, length; sd, standard deviation (variability).

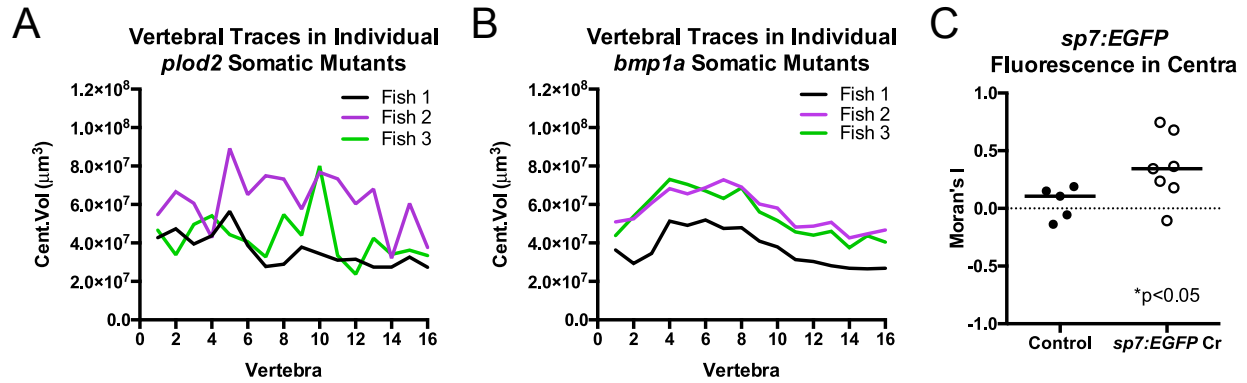

**Figure S6, Related to Figures 2 and 4. Vertebral traces for *plod2* and *bmp1a* show inter- and intra-individual variation among somatic groups.** (A,B) Vertebral traces for centrum volume of representative *plod2* (A) and *bmp1a* (B) somatic mutants. Traces for *plod2* somatic mutants are jagged (i.e. a high degree of intra-individual variation), whereas those for *bmp1a* somatic mutants appear relatively smooth. Both somatic mutants groups exhibit variability in expressivity across individuals (i.e. inter-individual variation). (C) Intra-individual variation is represented by a shift to a lower distribution of values for Moran's I for *plod2* (see Figure 4G) but not for *bmp1a* (see Figure 4G'). In contrast, Moran's I in *sp7:EGFP* somatic mutant larvae shows a shift towards clustered mosaicism in the centra of these fish.  $p < 0.05$  in a M.-W. test.

| Age (dpf) | Approximate Body Weight (g) | Food Type | % of body weight to feed | Feedings per day | Total amount per day per fish (mg) | Amount per fish per feeding (mg) |
|-----------|-----------------------------|-----------|--------------------------|------------------|------------------------------------|----------------------------------|
| 11-14     | 0.01                        | GM 75     | 20%                      | 3                | 1.98                               | 0.66                             |
| 15-17     | 0.02                        | GM 75     | 20%                      | 3                | 3.9                                | 1.3                              |
| 18-23     | 0.02                        | GM 150    | 20%                      | 3                | 3.9                                | 1.3                              |
| 24-30     | 0.04                        | GM 150    | 13%                      | 3                | 5.1                                | 1.7                              |
| 31-42     | 0.07                        | GM 300    | 10%                      | 2                | 7                                  | 3.5                              |
| 43-55     | 0.22                        | GM 300    | 7%                       | 2                | 15                                 | 7.5                              |
| 56+       | 0.4                         | GM 300    | 3%                       | 1                | 12                                 | 12                               |

**Table S1, Related to STAR Methods: Experimental Model and Subject Details (*Zebrafish rearing*). Feeding schedule used for experimental fish in the study. Feedings were done on a per fish basis to maintain consistent growth in mutant and control populations.**
